# Supplementary material for: Missorting of Plasma miRNAs in Aging and Alzheimer’s Disease
Source: bioRxiv or medRxiv preprint supplement (doi:10.1101/2022.03.18.22272622), 2022-03-21

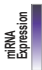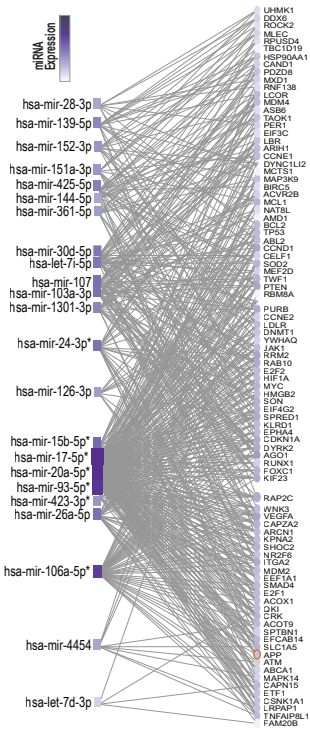

Supplement: Supplementary file [file media-3.pdf]
