# Supplementary material for: Missorting of Plasma miRNAs in Aging and Alzheimer’s Disease
Source: bioRxiv or medRxiv preprint supplement (doi:10.1101/2022.03.18.22272622), 2022-03-21
Supplement: Supplementary file [file media-5.pdf]

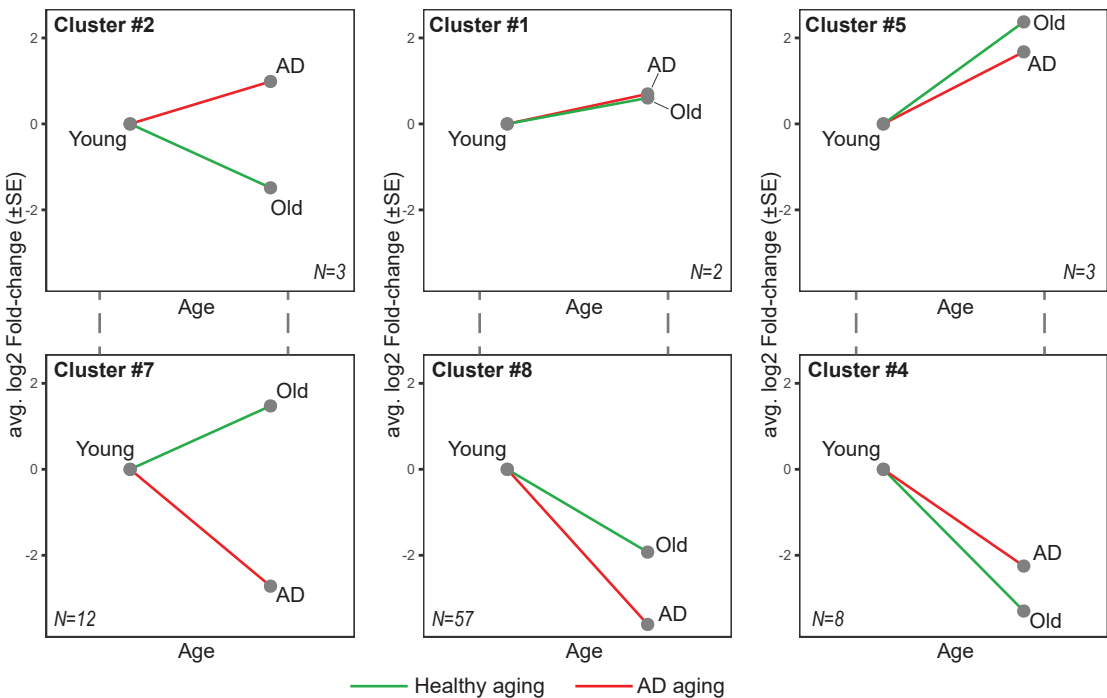

| Subcluster | Old ct Young | AD ct Young | AD ct Old | # miRNAs |
|------------|--------------|-------------|-----------|----------|
| Cluster #1 | up           | up          | up        | 2        |
| Cluster #2 | down         | up          | up        | 3        |
| Cluster #4 | down         | down        | up        | 8        |
| Cluster #5 | up           | up          | down      | 3        |
| Cluster #6 | down         | up          | down      | 3        |
| Cluster #7 | up           | down        | down      | 12       |
| Cluster #8 | down         | down        | down      | 57       |
